# Supplementary material for: Adolescents Perceptions and Behaviors Towards Periodic Health Examinations in Riyadh, Saudi Arabia
Source: Research Square preprint supplement (doi:10.21203/rs.3.rs-4664136/v2), 2024-07-25
Supplement: Supplementary file 1 [file 086d9faff21ca34c73202407.pdf]

Perception of adolescents regarding recommended periodic health examination for their age group in  
Riyadh

| Perception items                                                                                                        |                                               | No   | %     |
|-------------------------------------------------------------------------------------------------------------------------|-----------------------------------------------|------|-------|
| <b>How important do you feel periodic health examination for adolescents?</b>                                           | Very important                                | 511  | 42.6% |
|                                                                                                                         | Important                                     | 398  | 33.2% |
|                                                                                                                         | Neutral                                       | 101  | 8.4%  |
|                                                                                                                         | Not important                                 | 23   | 1.9%  |
|                                                                                                                         | I don't know                                  | 166  | 13.8% |
| <b>Would you apply for periodic health examination for adolescents if you had the chance?</b>                           | Yes                                           | 1044 | 87.1% |
|                                                                                                                         | No                                            | 155  | 12.9% |
| <b>In your opinion, what are the reasons that may prevent applying for periodic health examination for adolescents?</b> | Inadequate knowledge                          | 531  | 44.3% |
|                                                                                                                         | Financial state                               | 404  | 33.7% |
|                                                                                                                         | Unavailability of health insurance            | 311  | 25.9% |
|                                                                                                                         | The fear of visiting medical facilities       | 366  | 30.5% |
|                                                                                                                         | Inadequate time                               | 347  | 28.9% |
|                                                                                                                         | Lack of need due to the good health condition | 333  | 27.8% |
|                                                                                                                         | Lack of desire and enthusiasm                 | 296  | 24.7% |
|                                                                                                                         | Lack of transportations                       | 200  | 16.7% |
|                                                                                                                         | Lack of family support                        | 275  | 22.9% |
