# Supplementary material for: Adolescents Perceptions and Behaviors Towards Periodic Health Examinations in Riyadh, Saudi Arabia
Source: Research Square preprint supplement (doi:10.21203/rs.3.rs-4664136/v2), 2024-07-25
Supplement: Supplementary file 2 [file 4c4c98a2b1e1fc04bd5c1789.pdf]

|                                                                                                                                                                                                                   |                                                           |                                                           |                                                                      |                                                           |                                                         |                                                                      |                             |                             |
|-------------------------------------------------------------------------------------------------------------------------------------------------------------------------------------------------------------------|-----------------------------------------------------------|-----------------------------------------------------------|----------------------------------------------------------------------|-----------------------------------------------------------|---------------------------------------------------------|----------------------------------------------------------------------|-----------------------------|-----------------------------|
| 1- Gender                                                                                                                                                                                                         |                                                           |                                                           |                                                                      |                                                           |                                                         |                                                                      |                             |                             |
| <input type="checkbox"/> Male                                                                                                                                                                                     |                                                           |                                                           |                                                                      |                                                           | <input type="checkbox"/> Female                         |                                                                      |                             |                             |
| 2- Age (Gregorian)                                                                                                                                                                                                |                                                           |                                                           |                                                                      |                                                           |                                                         |                                                                      |                             |                             |
| <input type="checkbox"/> 12                                                                                                                                                                                       | <input type="checkbox"/> 13                               | <input type="checkbox"/> 14                               | <input type="checkbox"/> 15                                          | <input type="checkbox"/> 16                               | <input type="checkbox"/> 17                             | <input type="checkbox"/> 18                                          | <input type="checkbox"/> 19 | <input type="checkbox"/> 20 |
| 3- Nationality                                                                                                                                                                                                    |                                                           |                                                           |                                                                      |                                                           |                                                         |                                                                      |                             |                             |
| <input type="checkbox"/> Saudi                                                                                                                                                                                    |                                                           |                                                           |                                                                      |                                                           | <input type="checkbox"/> Non-Saudi                      |                                                                      |                             |                             |
| 4- Type of school                                                                                                                                                                                                 |                                                           |                                                           |                                                                      |                                                           |                                                         |                                                                      |                             |                             |
| <input type="checkbox"/> Public school                                                                                                                                                                            |                                                           |                                                           | <input type="checkbox"/> Private school                              |                                                           |                                                         | <input type="checkbox"/> International school                        |                             |                             |
| 5- Education level                                                                                                                                                                                                |                                                           |                                                           |                                                                      |                                                           |                                                         |                                                                      |                             |                             |
| <input type="checkbox"/> 1st grade<br>Intermediate-school                                                                                                                                                         | <input type="checkbox"/> 2nd grade<br>Intermediate-school | <input type="checkbox"/> 3rd grade<br>Intermediate-school | <input type="checkbox"/> 1st grade<br>Secondary-school               | <input type="checkbox"/> 2nd grade<br>Secondary-school    | <input type="checkbox"/> 3rd grade<br>Secondary-school  |                                                                      |                             |                             |
| 6- Educational level of the Father?                                                                                                                                                                               |                                                           |                                                           |                                                                      |                                                           |                                                         |                                                                      |                             |                             |
| <input type="checkbox"/> Uneducated                                                                                                                                                                               | <input type="checkbox"/> Primary-school                   | <input type="checkbox"/> Intermediate-school              | <input type="checkbox"/> Secondary-school                            | <input type="checkbox"/> University<br>(Bachelor,Diploma) | <input type="checkbox"/> Postgraduate<br>(Master's,PhD) |                                                                      |                             |                             |
| 7- Educational level of the Mother?                                                                                                                                                                               |                                                           |                                                           |                                                                      |                                                           |                                                         |                                                                      |                             |                             |
| <input type="checkbox"/> Uneducated                                                                                                                                                                               | <input type="checkbox"/> Primary-school                   | <input type="checkbox"/> Intermediate-school              | <input type="checkbox"/> Secondary-school                            | <input type="checkbox"/> University<br>(Bachelor,Diploma) | <input type="checkbox"/> Postgraduate<br>(Master's,PhD) |                                                                      |                             |                             |
| 8- Do suffer from any chronic illnesses or use medications regularly? <small>(Hypertension, Diabetes, Asthma, Tumors, Anemia)</small>                                                                             |                                                           |                                                           |                                                                      |                                                           |                                                         |                                                                      |                             |                             |
| <input type="checkbox"/> No                                                                                                                                                                                       |                                                           |                                                           |                                                                      |                                                           | <input type="checkbox"/> Yes (Name it): .....           |                                                                      |                             |                             |
| 9- In case your family needed medical care, which of the following options would you choose?                                                                                                                      |                                                           |                                                           |                                                                      |                                                           |                                                         |                                                                      |                             |                             |
| <input type="checkbox"/> I don't know                                                                                                                                                                             |                                                           |                                                           |                                                                      |                                                           |                                                         |                                                                      |                             |                             |
| <input type="checkbox"/> Visit Public Hospitals and clinics                                                                                                                                                       |                                                           |                                                           |                                                                      |                                                           |                                                         |                                                                      |                             |                             |
| <input type="checkbox"/> Visit Private Hospitals and clinics                                                                                                                                                      |                                                           |                                                           |                                                                      |                                                           |                                                         |                                                                      |                             |                             |
| <input type="checkbox"/> The family is eligible to visit Hospitals affiliated to government sectors<br><small>(Riyadh Military Hospital, National guards Hospital, King Khalid university hospital ..etc)</small> |                                                           |                                                           |                                                                      |                                                           |                                                         |                                                                      |                             |                             |
| <input type="checkbox"/> The family has VIP health insurance                                                                                                                                                      |                                                           |                                                           |                                                                      |                                                           |                                                         |                                                                      |                             |                             |
| <input type="checkbox"/> The family has standard health insurance                                                                                                                                                 |                                                           |                                                           |                                                                      |                                                           |                                                         |                                                                      |                             |                             |
| 10- How would you rate your knowledge regarding periodic health examination for adolescents?                                                                                                                      |                                                           |                                                           |                                                                      |                                                           |                                                         |                                                                      |                             |                             |
| <input type="checkbox"/> I feel that I have enough knowledge about it                                                                                                                                             |                                                           |                                                           | <input type="checkbox"/> I have awareness with no knowledge about it |                                                           |                                                         | <input type="checkbox"/> I feel that I don't have knowledge about it |                             |                             |
| 11- Who should perform periodic health examination for adolescents?                                                                                                                                               |                                                           |                                                           |                                                                      |                                                           |                                                         |                                                                      |                             |                             |
| <input type="checkbox"/> I don't know                                                                                                                                                                             |                                                           | <input type="checkbox"/> Healthy individuals              |                                                                      | <input type="checkbox"/> Sick individuals                 |                                                         | <input type="checkbox"/> Both                                        |                             |                             |

12- What is the best definition for periodic health examination for adolescents?

☐ I don't know

☐ Detection of serious illnesses such as cancer

☐ Examinations include blood analysis and body fluids to exclude the presence of illness

☐ A Group of medical procedures conducted periodically, and aim to check the health and some risk factors that may contribute to the incidence of the disease for adolescents

13- What are the medical check-ups that are scientifically recommended for adolescents?  
(You can choose multiple options)

☐ I don't know

|                                                            |                                                  |                                                      |                                             |
|------------------------------------------------------------|--------------------------------------------------|------------------------------------------------------|---------------------------------------------|
| <input type="checkbox"/> Sun exposure and Vitamin D levels | <input type="checkbox"/> Depression              | <input type="checkbox"/> Blood pressure              | <input type="checkbox"/> Smoking cessation  |
| <input type="checkbox"/> Oral hygiene                      | <input type="checkbox"/> Weight, length, and BMI | <input type="checkbox"/> Thyroid gland               | <input type="checkbox"/> Cholesterol levels |
| <input type="checkbox"/> Blood Glucose levels              | <input type="checkbox"/> Complete blood count    | <input type="checkbox"/> Sexual transmitted diseases | <input type="checkbox"/> Hepatitis          |
| <input type="checkbox"/> Kidney functions                  | <input type="checkbox"/> Live functions          | <input type="checkbox"/> Stool & urine analysis      | Other: .....                                |

14- What is the best time to apply for periodic health examination for adolescents?

|                                       |                                       |                                       |                                       |                                 |
|---------------------------------------|---------------------------------------|---------------------------------------|---------------------------------------|---------------------------------|
| <input type="checkbox"/> I don't know | <input type="checkbox"/> At age of 12 | <input type="checkbox"/> At age of 14 | <input type="checkbox"/> At age of 18 | <input type="checkbox"/> Yearly |
|---------------------------------------|---------------------------------------|---------------------------------------|---------------------------------------|---------------------------------|

15- What are the sources that contributed to increase the level of your knowledge regarding periodic health examination for adolescents? (You can choose multiple options)

|                                                        |                                                  |                                      |                                            |
|--------------------------------------------------------|--------------------------------------------------|--------------------------------------|--------------------------------------------|
| <input type="checkbox"/> I don't have enough knowledge | <input type="checkbox"/> Internet & social media | <input type="checkbox"/> TV programs | <input type="checkbox"/> School's subjects |
| <input type="checkbox"/> Medical team                  | <input type="checkbox"/> Friends                 | <input type="checkbox"/> Family      | Other: .....                               |

Periodic health examination for adolescents: A group of examinations and assessments, applied for healthy adolescents to identify their susceptibility to common diseases for their age group, and the risk factors causing these diseases

16- How important do you feel periodic health examination for adolescents?

|                                       |                                         |                                    |                                  |                                        |                                          |
|---------------------------------------|-----------------------------------------|------------------------------------|----------------------------------|----------------------------------------|------------------------------------------|
| <input type="checkbox"/> I don't know | <input type="checkbox"/> Very important | <input type="checkbox"/> Important | <input type="checkbox"/> Neutral | <input type="checkbox"/> Not important | <input type="checkbox"/> Never important |
|---------------------------------------|-----------------------------------------|------------------------------------|----------------------------------|----------------------------------------|------------------------------------------|

17- Would you apply for periodic health examination for adolescents if you had the chance?

|                              |                                          |
|------------------------------|------------------------------------------|
| <input type="checkbox"/> Yes | <input type="checkbox"/> No (Why): ..... |
|------------------------------|------------------------------------------|

18- In your opinion, what are the reasons that may prevent applying for periodic health examination for adolescents? (You can choose multiple options)

|                                                |                                          |                                                  |                                                     |                                          |
|------------------------------------------------|------------------------------------------|--------------------------------------------------|-----------------------------------------------------|------------------------------------------|
| <input type="checkbox"/> Inadequate knowledge  | <input type="checkbox"/> Financial state | <input type="checkbox"/> No health insurance     | <input type="checkbox"/> Fear of medical facilities | <input type="checkbox"/> Inadequate time |
| <input type="checkbox"/> Good health condition | <input type="checkbox"/> Lack of desire  | <input type="checkbox"/> Lack of transportations | <input type="checkbox"/> Lack of family support     | Other: .....                             |

|                                                                                                                           |                                                               |                                                              |                                                     |
|---------------------------------------------------------------------------------------------------------------------------|---------------------------------------------------------------|--------------------------------------------------------------|-----------------------------------------------------|
| 19- Have you ever done periodic health examination before?                                                                |                                                               |                                                              |                                                     |
| <input type="checkbox"/> Yes                                                                                              |                                                               | <input type="checkbox"/> No (If the answer is No, STOP here) |                                                     |
| 20- What is the frequency of your periodic health examination visits?                                                     |                                                               |                                                              |                                                     |
| <input type="checkbox"/> I've done it once                                                                                | <input type="checkbox"/> Every 6 months                       | <input type="checkbox"/> Yearly                              | <input type="checkbox"/> I do it in irregular basis |
| 21- What are the medical check-ups you have done? <u>(You can choose multiple options)</u>                                |                                                               |                                                              |                                                     |
| <input type="checkbox"/> Sun exposure and Vitamin D levels                                                                | <input type="checkbox"/> Depression                           | <input type="checkbox"/> Blood pressure                      | <input type="checkbox"/> Smoking cessation          |
| <input type="checkbox"/> Oral hygiene                                                                                     | <input type="checkbox"/> Weight, length, and BMI              | <input type="checkbox"/> Thyroid gland                       | <input type="checkbox"/> Cholesterol levels         |
| <input type="checkbox"/> Blood Glucose levels                                                                             | <input type="checkbox"/> Complete blood count                 | <input type="checkbox"/> Sexual transmitted diseases         | <input type="checkbox"/> Hepatitis                  |
| <input type="checkbox"/> Kidney functions                                                                                 | <input type="checkbox"/> Live functions                       | <input type="checkbox"/> Stool & urine analysis              |                                                     |
| 22- Where have applied periodic health examination?                                                                       |                                                               |                                                              |                                                     |
| <input type="checkbox"/> Public hospital                                                                                  | <input type="checkbox"/> Private hospital                     | <input type="checkbox"/> Public clinic                       |                                                     |
| <input type="checkbox"/> Private clinic                                                                                   | <input type="checkbox"/> Private lab                          | <input type="checkbox"/> Other: .....                        |                                                     |
| 23- What are the reasons that made you apply for periodic health examination?<br><u>(You can choose multiple options)</u> |                                                               |                                                              |                                                     |
| <input type="checkbox"/> Early detection of diseases                                                                      | <input type="checkbox"/> Quit harmful habits (Smoking, Drugs) | <input type="checkbox"/> Worrying                            |                                                     |
| <input type="checkbox"/> Family history                                                                                   | <input type="checkbox"/> General health                       | <input type="checkbox"/> Other: .....                        |                                                     |
| 24- Do you encourage adolescents to apply for periodic health examination?                                                |                                                               |                                                              |                                                     |
| <input type="checkbox"/> Yes                                                                                              |                                                               | <input type="checkbox"/> No (Why): .....                     |                                                     |

**The Questionnaire is over**  
**Thank you for your patience**
